# Supplementary material
Source: MDPI journal article supplement (https://www.mdpi.com/2504-5377/8/1/6)
Supplement: s1 [file s1]

# Enhancing Oil Uptake Efficiency with an Alkyl Polyglycoside-Dodecanol Formulation

Lorenzo Veronico <sup>1</sup>, Giuseppe Colafemmina <sup>1,2</sup> and Luigi Gentile <sup>1,2,\*</sup>

<sup>1</sup> Department of Chemistry, University of Bari "Aldo Moro", Via Orabona 4, 70126 Bari, Italy

<sup>2</sup> Bari Unit, Center of Colloid and Surface Science (CSGI), Via Orabona 4, 70126 Bari, Italy

\* Correspondence: luigi.gentile@uniba.it

## Supporting information

Figure S1 shows DLS measurements conducted on samples CG5 and CG10 from which it can be seen from both the volume-weighted distribution and the correlation function that the micelle sizes of the two samples are approximately the same and agree with the NMR scattering measurements.

The volume-weighted distribution was calculated by considering the refractive index of Triton® X-100, which is 1.49, as the refractive index of Triton® CG-110 is unknown at the backscattering angle of 173°.

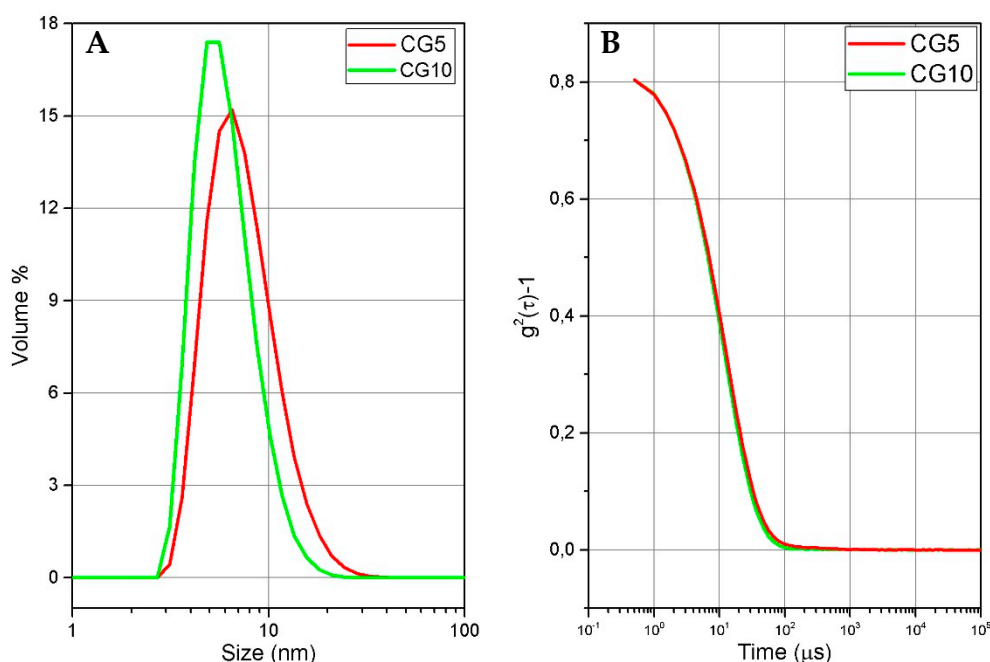

**Figure S1:** Correlation function (B) and volume-weighted distribution (A) of the C<sub>8-10</sub>P<sub>m</sub> and C<sub>8-10</sub>P<sub>m</sub> + C<sub>12</sub>OH.

**Table S1:** Samples under investigation for figure S2

| Label | C <sub>8-10</sub> G <sub>m</sub> | C <sub>8-10</sub> G <sub>m</sub> | C <sub>12</sub> OH |
|-------|----------------------------------|----------------------------------|--------------------|
|       | (v/v% of the initial solution)   | (v/v % of the surfactant)        | (v/v %)            |
| CG1P  | 1.56                             | 1                                | -                  |
| CG5P  | 7.81                             | 5                                | -                  |
| CG10P | 15.63                            | 10                               | -                  |

Figure S2 supplements Figure 3 by showing the samples made using 1, 5, 10 v/v% of effective surfactant. It can be seen that even increasing surfactant concentration, cleaning efficiency results below respect to values found for CGXC series samples, where X equals to 1, 5 and 10.

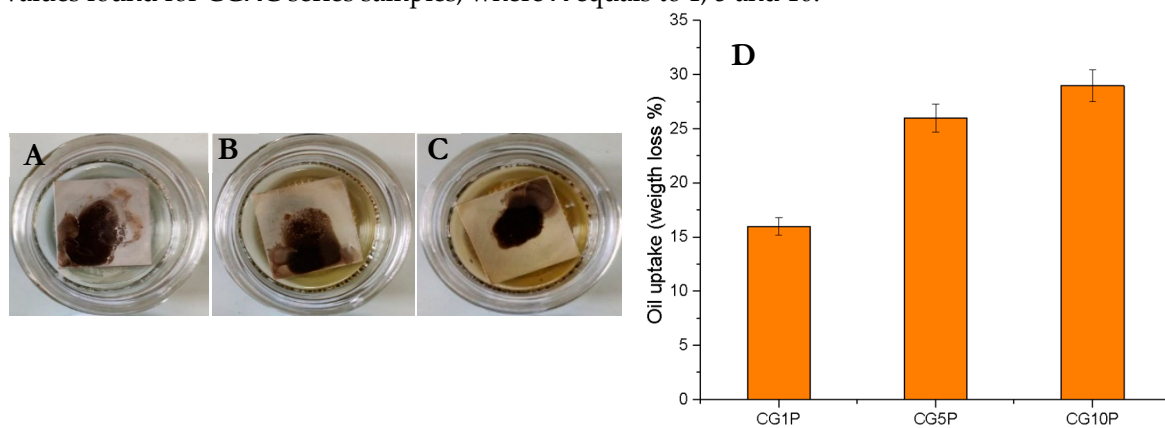

**Figure S2:** Cleaning tests of stainless-steel plates for CG1P (A), CG5P (B) and CG10P (C) samples and cleaning efficiency indicating by weight loss or oil uptake (D).
